# Supplementary material for: TP53 mutations and RNA-binding protein MUSASHI-2 drive resistance to PRMT5-targeted therapy in B-cell lymphoma
Source: PubMed Central journal article supplement (PMC9515221; doi:10.1038/s41467-022-33137-8), 2022-09-27
Supplement: 41467_2022_33137_MOESM1_ESM.pdf [file 41467_2022_33137_MOESM1_ESM.pdf]

**Supplementary Information:**

***TP53* mutations and RNA binding protein MUSASHI2 drive resistance to PRMT5-targeted therapy in B-cell lymphoma**

Tatiana Erazo<sup>1</sup>, Chiara M. Evans<sup>1,2</sup>, Daniel Zakheim<sup>3</sup>, Eren L. Chu<sup>1</sup>, Alice Yunsi Refermat<sup>3</sup>, Zahra Asgari<sup>4</sup>, Xuejing Yang<sup>1</sup>, Mariana Da Silva Ferreira<sup>1</sup>, Sanjoy Mehta<sup>3</sup>, Marco Vincenzo Russo<sup>3</sup>, Andrea Knezevic<sup>5</sup>, Xi-Ping Zhang<sup>6</sup>, Zhengming Chen<sup>7</sup>, Myles Fennell<sup>3</sup>, Ralph Garippa<sup>3</sup>, Venkatraman Seshan<sup>5</sup>, Elisa de Stanchina<sup>8</sup>, Olena Barbash<sup>6</sup>, Connie Lee Batlevi<sup>4</sup>, Christina S. Leslie<sup>9</sup>, Ari M. Melnick<sup>10</sup>, Anas Younes<sup>4\*#</sup>, Michael G. Kharas<sup>1\*#</sup>

<sup>1</sup>Molecular Pharmacology Program, Experimental Therapeutics Center and Center for Stem Cell Biology, Memorial Sloan Kettering Cancer Center, New York, N, USA.

<sup>2</sup>Department of Pharmacology, Weill Cornell School of Medical Sciences, New York, NY, USA.

<sup>3</sup>Gene Editing and Screening Core, Memorial Sloan Kettering Cancer Center, New York, NY, USA.

<sup>4</sup>Lymphoma Service, Memorial Sloan Kettering Cancer Center, New York, NY, USA.

<sup>5</sup>Department of Epidemiology and Biostatistics, Memorial Sloan Kettering Cancer Center, New York, NY, USA.

<sup>6</sup>Epigenetics Research Unit, GlaxoSmithKline, Collegeville, PA 19426, USA.

<sup>7</sup>Division of Biostatistics and Epidemiology, Weill Cornell Medicine, New York, NY 10021, USA.

<sup>8</sup>Antitumor Assessment Core, Memorial Sloan Kettering Cancer Center, New York, NY, USA.

<sup>9</sup>Computational Biology Program, Memorial Sloan Kettering Cancer Center, New York, NY, USA.

<sup>10</sup>Division of Hematology and Medical Oncology, Sanford I. Weill Department of Medicine, Weill Cornell Medicine, New York, NY, USA

\* These authors jointly supervised this work: Anas Younes and Michael G Kharas

# Corresponding Authors: (Lead contact) Michael G Kharas: [kharasm@mskcc.org](mailto:kharasm@mskcc.org), Anas Younes: [anas.younes@astrazeneca.com](mailto:anas.younes@astrazeneca.com)

# Supplementary figures

**A**

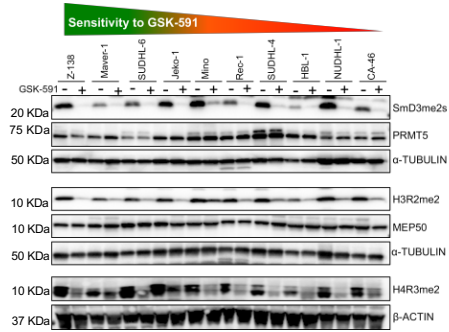

**B**

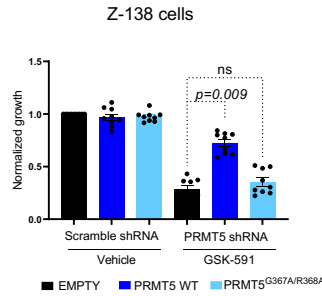

**C**

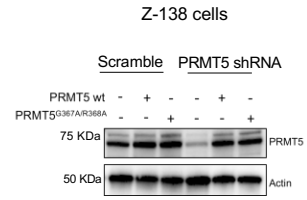

**D**

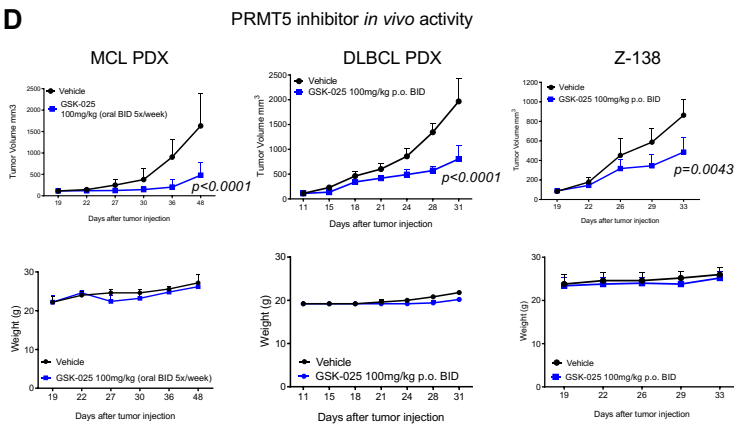

**E**

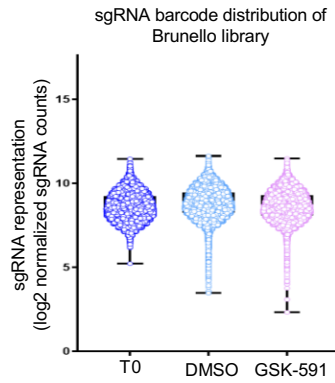

**F**

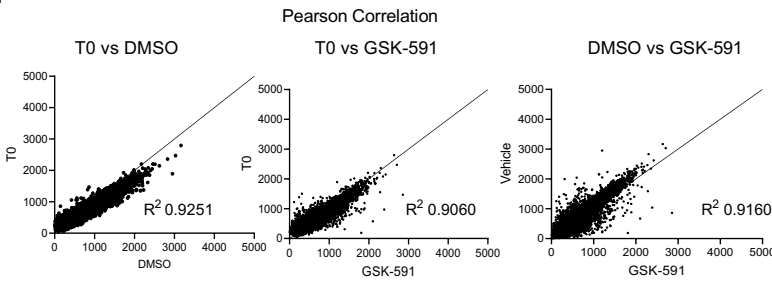

**G**

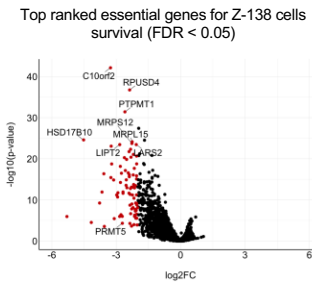

**H**

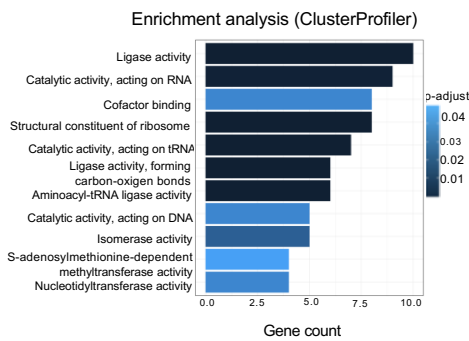

**I**

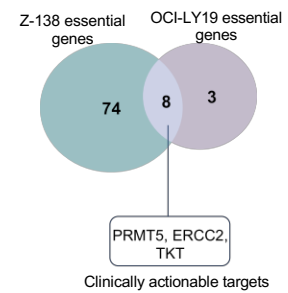

**Supplementary Fig. 1. PRMT5 is essential for lymphoma cells survival.**

**A.** Immunoblots showing GSK-591 inhibits PRMT5 activity in lymphoma cell lines after 48 hours of treatment. PRMT5 specific targets of PRMT5, PRMT5 and MEP50 were analyzed alpha-tubulin and beta-actin were used as loading control. **B.** Z-138 cells expressing PRMT5 shRNA or scramble shRNA were transduced with Flag-tagged PRMT5 wild type (wt) or catalytic dead double mutant (PRMT5<sup>G367A/R368A</sup>) or Flag-empty vector. Cells were treated with GSK-591 (1  $\mu$ M) and cell viability assay was performed 4 days post-transduction. Differences between groups (scramble versus PRMT5 shRNA) were calculated with the Student's test, \* $p < 0.05$ . **C.** Immunoblot analysis of the indicated proteins from cells expressing PRMT5 shRNA or scramble. **D.** Relapsed MCL DFBL-98848 and DLBCL DFBL-75549 PDX lines and Z-138 were xenografted subcutaneously in NSG mice. After about 2 weeks, animals were randomized ( $n=8$ /group) and treated with vehicle or GSK-025, 100 mg/kg twice/day for 21 days. Data are represented as mean  $\pm$  SEM.  $p$ -values were calculated by two-sided ANOVA. **E.** Box plot showing the sgRNA normalized read counts at Day 0 (T0) and after 8 days of treatment with GSK-591 or DMSO. Maxima = 12.4 and minimum = 2.9. **F.** Pearson correlation coefficient of the normalized sgRNA read counts from Brunello library of transduced cells at Day 0 and upon treatment with GSK-591 and DMSO. **G.** Volcano plot showing the top essential genes for Z-138 cells survival. The  $x$ -axis shows  $\log_2$  fold change and the  $y$ -axis shows  $-\log_{10}$  of the adjusted  $P$  value (adjust  $p$ -value  $< 0.05$ ). Red dots represent the genes that were significant depleted defined by adjust  $p$ -value  $< 0.1$  and  $\log_2FC < -2$ .  $p$ -values and  $\log_2FC$  were generated using the Wilcoxon-Mann-Whitney test in the CAMERA function. **H.** Pathway enrichment analysis of essential genes for Z-138 lymphoma cells survival. To identify the Gene ontology categories and corresponding  $p$ -values a one-sided version of Fisher's test was performed. **I.** Overlap of dropout genes in Z-138 and OCI-LY19 identified by the CRISPR screens to determine the potentially actionable targets, that are the genes that encoded for proteins with available inhibitors reported in the DepMap database.

**A**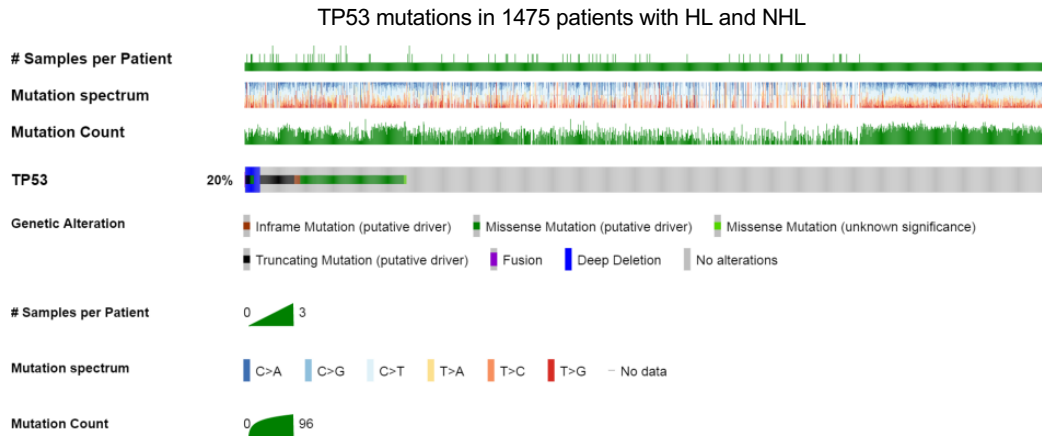**B**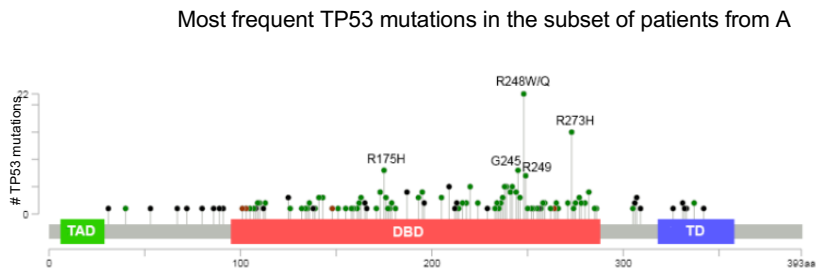**C**

qPCR array in Z-138 Cas9 cells

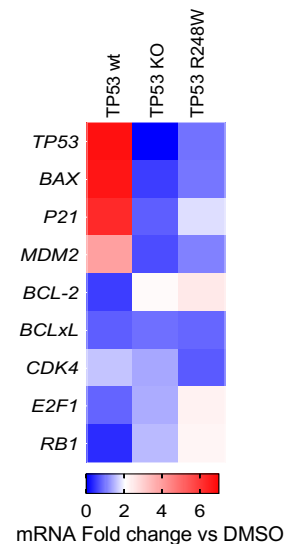

### Supplementary Fig. 2. *TP53*<sup>R248W/Q</sup> is the most common mutation in lymphoma patients.

**A.** OncoPrint showing distribution of mutations in *TP53* in 1475 patients diagnosed with HL and NHL. Data obtained from MSKCC cBioportal database after targeted next-generation sequencing using MSKCC HemePACT platform. The percentage of tumors with alterations is indicated. **B.** Lollipop plot showing that *TP53*<sup>R248W/Q</sup> is the most frequent mutation, followed by R273H, R175H, G245 and R249 in the subset (20%) of lymphoma patients from C that carries mutations in *TP53*. *TP53* domains: TAD (trans-activation domain), DBD (DNA-binding domain) and TD (tetramerization domain). **C.** Heat map showing the effect of GSK-591 (1µM) treatment for 48 h on P53 pathway, determined by a PCR-directed array in Z-138 *TP53* wt (parental) and P53 KO1 and *TP53*<sup>R248W</sup> (Clone 2). Fold change values are depicted in a colorimetric scale from blue (low) to red (high) with respect to control (DMSO). The experiments were carried out in triplicate.

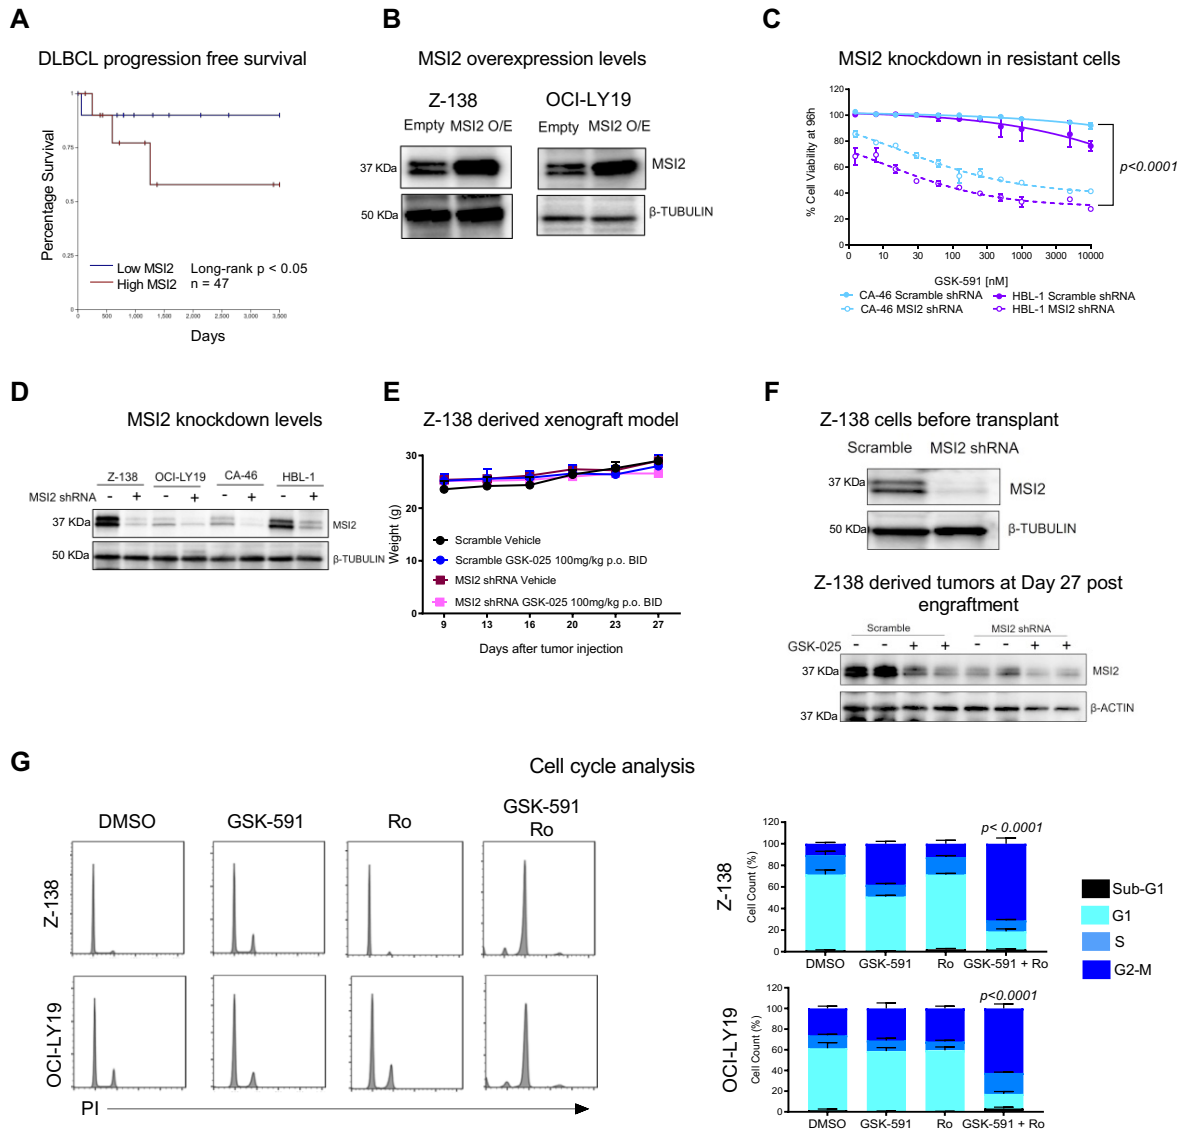

**Supplementary Fig. 3. MSI2 knockdown sensitizes cells to PRMT5 inhibitor and combination of GSK-591 and Ro induced cell cycle arrest.**

**A.** Progression-free survival of DLBCL patients with different levels of expression of MSI2 (TCGA). **B.** Immunoblot analysis of MSI2 in Z-138 and OCI-LY19 cells overexpressing empty vector or FLAG-MSI2 96h post-transduction. **C.** HBL-1 and CA-46 cells were transduced with lentivirus expressing control shRNA(shCtrl) or shRNA targeting MSI2. Error bars represent SD of three different experiments.  $*p < 0.01$ . **D.** Immunoblot analysis of MSI2 knockdown in Z-138, OCI-LY19, HBL-1 and CA-46 cells transduced with shRNA(shCtrl) or shRNA targeting MSI2. **E.** Variations of body weight over time are shown from mice treated with vehicle or GSK-025, 100 mg/kg twice/day for 21 days. **F.** Immunoblot analysis of MSI2 knockdown in Z-138 transduced with scramble or MSI2 shRNA previous transplant into NSG mice and tumor lysates from two mice per condition were analyzed at Day 27 post-engraftment. **G.** Drug combination induced G2/M cell-cycle arrest. Effect of the 5uM GSK-591 and Ro alone or in combination for 24h on cell-cycle fractions in lymphoma cell lines, Z-138 and OCI-LY19. Error bars represent S.E.M. of triplicate experiments.

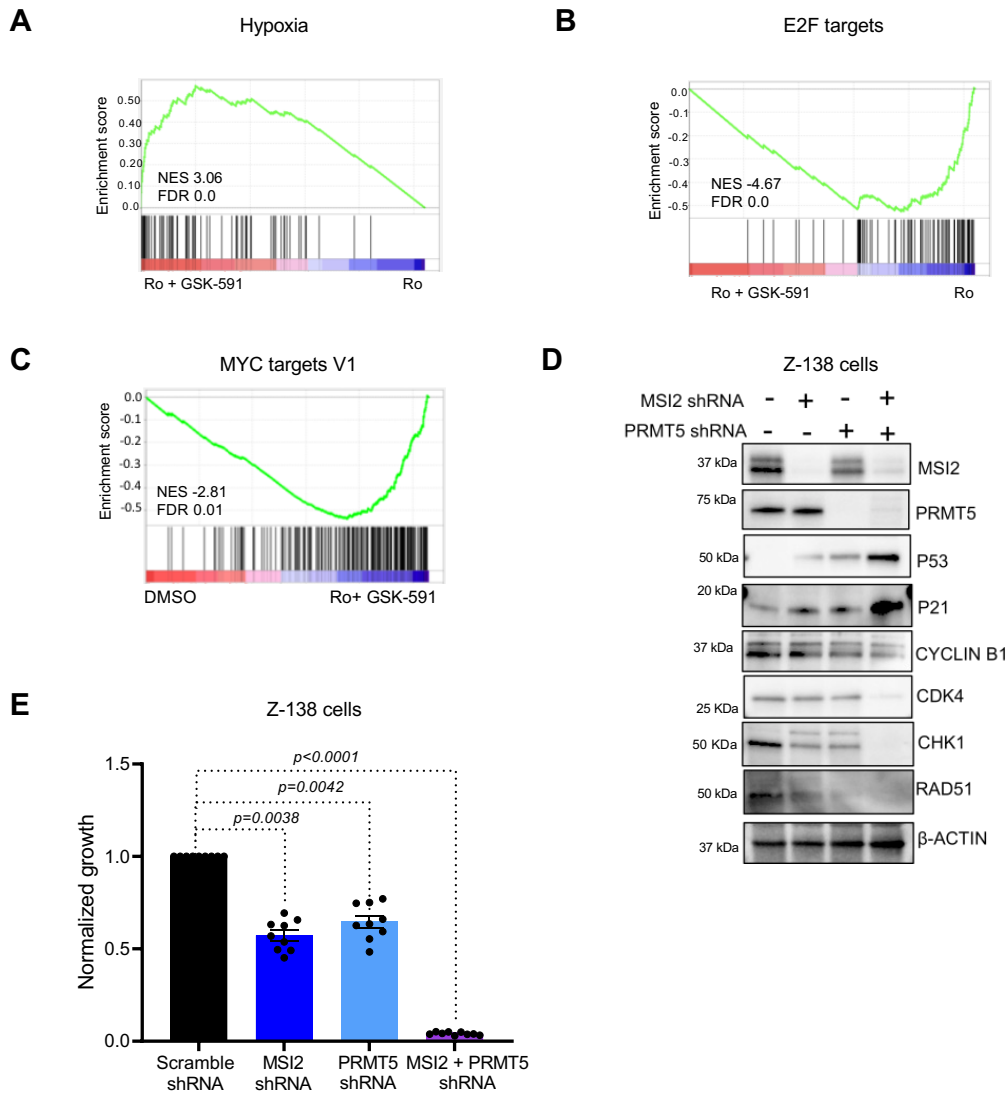

**Supplementary Fig. 4. Dual targeting of MSI2 and PRMT5 induced transcriptional changes in multiple pathways.** **A.** GSEA enrichment plots for the pathway gene set 'Hypoxia' of mRNA expression changes observed upon the combination of Ro and GSK-591 vs. Ro in Z-138 cells. **B.** GSEA enrichment plots for the pathway gene set 'E2F targets' of mRNA expression changes observed upon the combination of Ro and GSK-591 vs. Ro in Z-138 cells. **C.** GSEA enrichment plots for the pathway gene set 'MYC TARGETS V1' of mRNA expression changes observed upon the combination of Ro and GSK-591 vs. control in Z-138 cells. **D.** Immunoblot analysis of the indicated proteins from Z-138 cells transduced with shRNAs targeting PRMT5 and MSI2. **E.** MSI2 and PRMT5 genetic depletion reduced cell growth. Z-138 cells were transduced with lentivirus expressing shRNA targeting PRMT5, MSI2 or scramble. Cell viability was assessed 5 days after transduction and puromycin selection. Experiments were performed in triplicates and *p-values* were determined using two-tailed *t* test.

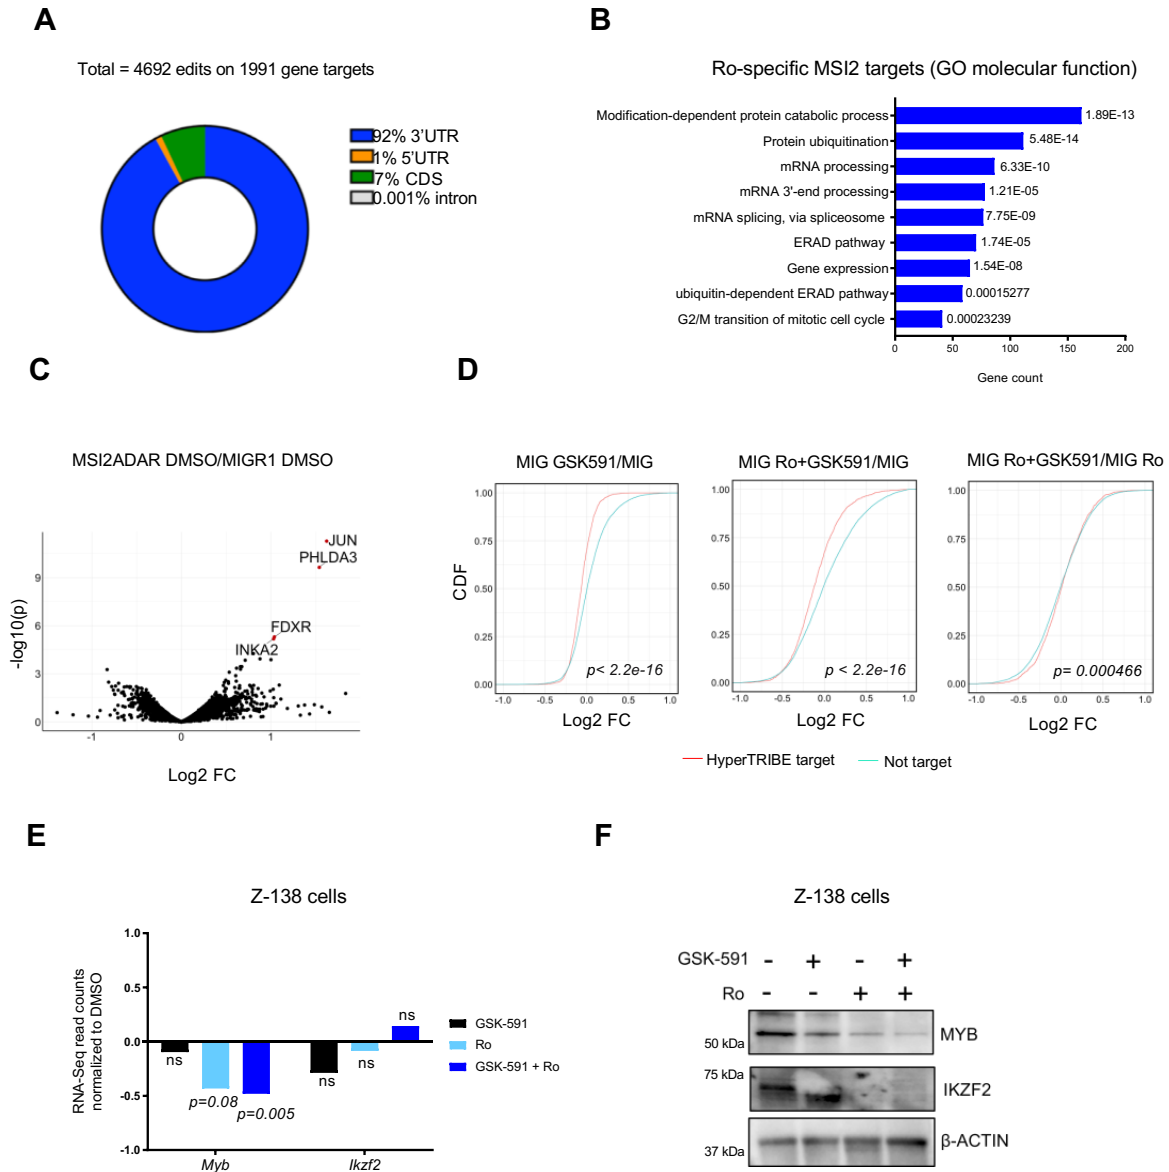

**Supplementary Fig. 5. MSI2-ADAR binds to the 3'UTRs and does not induce changes in the transcriptome.** **A.** Total number of MSI2-HyperTRIBE significant edit sites, target genes, and distribution of sites on the genes in Z-138 cells from three HyperTRIBE experiments. **B.** Top significant enriched GO molecular functions in the Ro-specific targets using ENRICHR analysis. **C.** Differential expression (DESeq2) analysis of MSI2-ADAR overexpression in Z-138 cells. Red dots represent genes with significant differential expression in MSI2-ADAR versus MIG control defined as adjusted  $p$ -value  $< 0.1$ . **D.** CDF plots showing the distribution of mRNA abundance changes in MSI2 HyperTRIBE targets upon the indicated conditions. A two-sided KS test was used to calculate the  $p$ -values. **E.** mRNA expression of *MYB* and *IKZF2* from RNA-Seq experiment Fig. 4E,  $n = 3$ . Adjust  $p$ -values are indicated. **F.** Immunoblot analysis of *MYB* and *IKZF2* from Z-138 cells treated with 5 $\mu$ M of Ro and/or GSK-591 for 24h.

**A**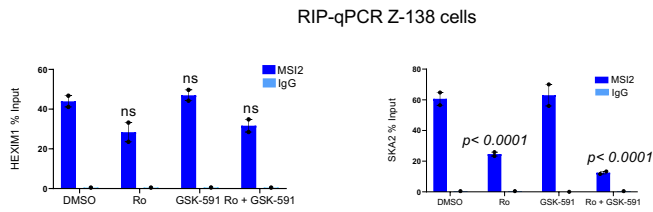**B**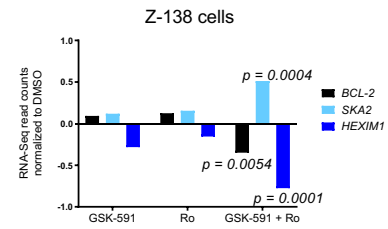**C**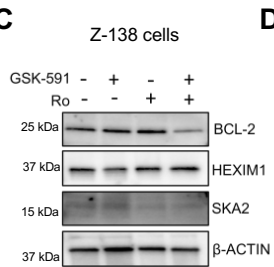**D**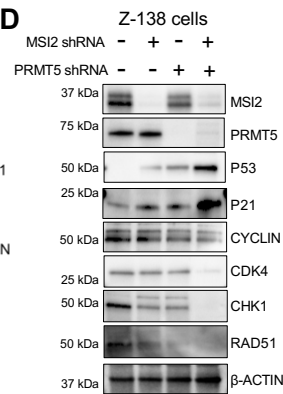**E**

Immunohistochemistry staining Z-138 derived tumors at Day 27 post engraftment

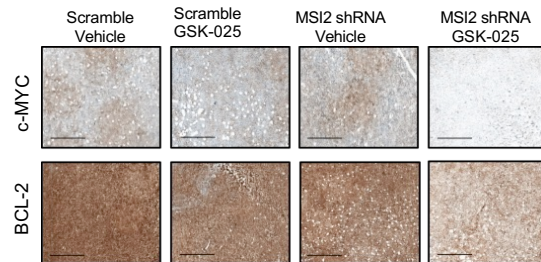**F**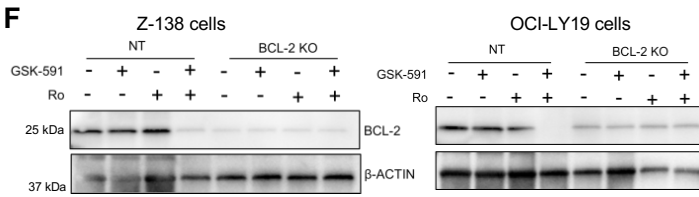**G**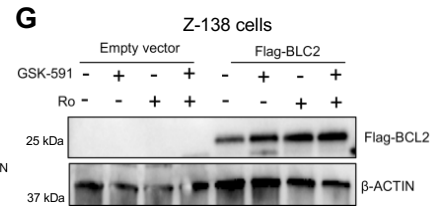**H**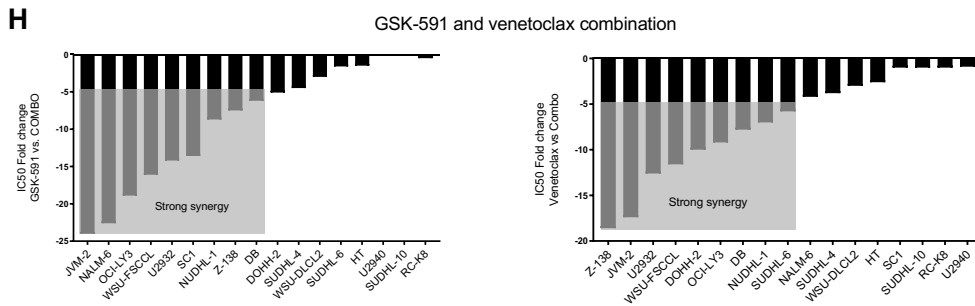**I**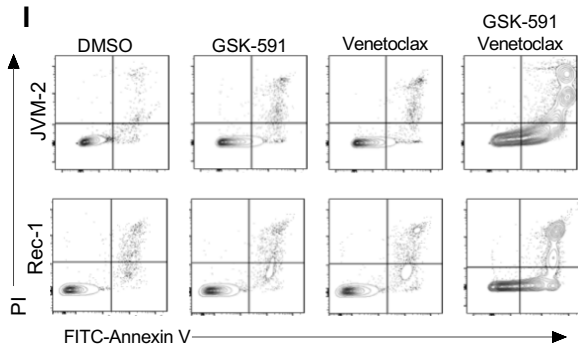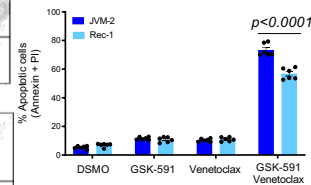**J**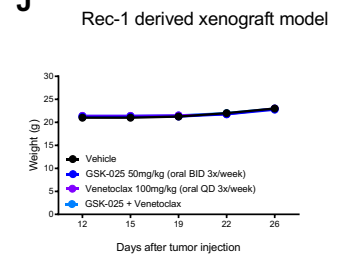



**Supplementary Fig. 6. SKA2 and BCL-2 are targets of MSI2 and combination of GSK-591 and venetoclax induced apoptosis.**

**A.** qRT-PCR of recovered RNA from *MSI2* RNA-IP from Z-138 cells treated with 5 $\mu$ M GSK-591 and/or Ro for 24h. *HEXIM1* and *SKA2* mRNA enrichment are shown as the percentage (IP/input) and normalized to DMSO  $\pm$  SD of two independent experiments. IgG served as a non-specific binding control. **B.** BCL-2 mRNA expression from RNA-Seq experiment Figure 4E, n = 3. Adjust *p-values* are indicated. **C.** Immunoblot analysis of BCL-2, *HEXIM1* and *SKA2* in Z-138 cells treated with GSK-591, Ro or combination for 72h. **D.** Immunoblot analysis of the indicated proteins from Z-138 cells transduced with shRNAs targeting *PRMT5* and *MSI2*, after 3 days of puromycin selection. **E.** Immunohistochemistry images showing that *MSI2* depletion decreased c-MYC and BCL-2 protein abundance in tumors from mice treated with GSK-025 (100 mg/kg, BID 3x/week PO) for 3 weeks. Scale bars, 1000 $\mu$ m. **F.** Immunoblot showing the efficient BCL-2 knockout in Z-138 and OCI-LY19 Cas9 cells and the effect of GSK-591 and Ro (5 $\mu$ M) treatment for 72 h. **G.** Immunoblot analysis of Flag-BCL-2 expression in Z-138 cells overexpressing empty vector or Flag-BCL-2 72h post-transduction. **H.** Bar graph showing the fold change in IC50 values of GSK-591 (upper graph) and Venetoclax (bottom graph) in combination compared to single-agent. Shaded area showing the cell lines where the drug combination yielded > 5-fold shift in IC50 over single-agent, that represents strong synergy. Lymphoma cell lines were treated with *PRMT5* inhibitor and venetoclax single agent or in combination using a fixed 1:1 ratio of each inhibitor over a 20-point titration, using a top dose of  $\geq$ 14 $\mu$ M for both drugs. Cells were treated for 6 days and Celltiter-Glo proliferation assays were performed. **I.** Representative flow cytometry plots and quantification to show apoptosis of JVM-2 and Rec-1 cells treated with GSK-591 and/or venetoclax. Experiments were performed in triplicates and *p-values* were determined using two-tailed *t* test. **J.** Variations of body weight over time are shown from mice treated with vehicle, GSK-025 (50 mg/kg twice/day), venetoclax (100 mg/kg five times weekly) or the combination for 3 weeks.

## Supplementary Tables

### Supplementary Table T1. ClusterProfiler essential genes:

| ID         | Description                                                                   | p.adjust | qvalue  | Count | Gene.in.Pathway                                                   |
|------------|-------------------------------------------------------------------------------|----------|---------|-------|-------------------------------------------------------------------|
| GO:0016874 | ligase activity                                                               | 4.1E-08  | 3.3E-08 | 10    | EARS2; GCLC; HARS2; LARS2; LIPT2; MARS2; PPCS; RTCB; VARS2; YARS2 |
| GO:0004812 | aminoacyl-tRNA ligase activity                                                | 4.1E-08  | 3.3E-08 | 6     | EARS2; HARS2; LARS2; MARS2; VARS2; YARS2                          |
| GO:0016875 | ligase activity, forming carbon-oxygen bonds                                  | 4.1E-08  | 3.3E-08 | 6     | EARS2; HARS2; LARS2; MARS2; VARS2; YARS2                          |
| GO:0140101 | catalytic activity, acting on a tRNA                                          | 2.0E-05  | 1.6E-05 | 7     | EARS2; HARS2; LARS2; MARS2; RPP21; VARS2; YARS2                   |
| GO:0003735 | structural constituent of ribosome                                            | 3.2E-05  | 2.6E-05 | 8     | MRPL15; MRPL20; MRPL57; MRPS12; MRPS14; MRPS18A; MRPS34; MRPS6    |
| GO:0140098 | catalytic activity, acting on RNA                                             | 1.2E-03  | 9.9E-04 | 9     | EARS2; HARS2; LARS2; MARS2; POLRMT; RPP21; RTCB; VARS2; YARS2     |
| GO:0016853 | isomerase activity                                                            | 2.7E-02  | 2.1E-02 | 5     | PGM3; RPE; RPIA; RPU5D4; TPI1                                     |
| GO:0070181 | small ribosomal subunit rRNA binding                                          | 2.7E-02  | 2.2E-02 | 2     | MRPS18A; MRPS6                                                    |
| GO:0000049 | tRNA binding                                                                  | 3.9E-02  | 3.2E-02 | 3     | EARS2; HSD17B10; YARS2                                            |
| GO:0048037 | cofactor binding                                                              | 3.9E-02  | 3.2E-02 | 8     | ALAS1; COX15; ERCC2; GAPDH; GCLC; GLRX5; NUBP1; TKT               |
| GO:0016779 | nucleotidyltransferase activity                                               | 3.9E-02  | 3.2E-02 | 4     | GMPPB; MTPAP; POLG2; POLRMT                                       |
| GO:0016881 | acid-amino acid ligase activity                                               | 3.9E-02  | 3.2E-02 | 2     | GCLC; PPCS                                                        |
| GO:0019843 | rRNA binding                                                                  | 3.9E-02  | 3.2E-02 | 3     | MRPL20; MRPS18A; MRPS6                                            |
| GO:0140097 | catalytic activity, acting on DNA                                             | 3.9E-02  | 3.2E-02 | 5     | ERCC2; NGAMT1; POLG2; RAD50; RUVBL1                               |
| GO:0051536 | iron-sulfur cluster binding                                                   | 3.9E-02  | 3.2E-02 | 3     | ERCC2; GLRX5; NUBP1                                               |
| GO:0051540 | metal cluster binding                                                         | 3.9E-02  | 3.2E-02 | 3     | ERCC2; GLRX5; NUBP1                                               |
| GO:0016780 | phosphotransferase activity, for other substituted phosphate groups           | 4.2E-02  | 3.4E-02 | 2     | AASDHPTT; CDIPT                                                   |
| GO:0008757 | S-adenosylmethionine-dependent methyltransferase activity                     | 4.7E-02  | 3.7E-02 | 4     | DPH5; NGAMT1; PRMT5; WDR82                                        |
| GO:0016769 | transferase activity, transferring nitrogenous groups                         | 4.7E-02  | 3.7E-02 | 2     | GAPDH; GEPT1                                                      |
| GO:0008276 | protein methyltransferase activity                                            | 5.0E-02  | 4.0E-02 | 3     | NGAMT1; PRMT5; WDR82                                              |
| GO:0004129 | cytochrome-c oxidase activity                                                 | 5.0E-02  | 4.0E-02 | 2     | COX15; COX411                                                     |
| GO:0015002 | heme-copper terminal oxidase activity                                         | 5.0E-02  | 4.0E-02 | 2     | COX15; COX411                                                     |
| GO:0016676 | oxidoreductase activity, acting on a heme group of donors, oxygen as acceptor | 5.0E-02  | 4.0E-02 | 2     | COX15; COX411                                                     |
| GO:0003678 | DNA helicase activity                                                         | 5.0E-02  | 4.0E-02 | 3     | ERCC2; RAD50; RUVBL1                                              |

### Supplementary Table T2. GSK-591 IC50 and TP53 mutation status

| P53 STATUS   | Lymphoma cells | IC50 (µM) | Allele frequency |
|--------------|----------------|-----------|------------------|
| WT           | U2973          | 0.0086    | 1                |
| WT           | Z-138          | 0.024     | 1                |
| X224_splice  | SUDHL-6        | 0.053     | 0.49             |
| Y234C        | SUDHL-6        | 0.053     | 0.5              |
| WT           | OCI-LY19       | 0.058     | 1                |
| G112_V122del | L-428          | 0.13      | 0.28             |
| D281E        | Maver-1        | 0.12      | 1                |
| K132R        | Ri-1           | 0.137     | 0.48             |
| E294*        | Ri-1           | 0.137     | 0.51             |
| C176Y        | U-2932         | 0.14      | 1                |
| L334P        | U-2932         | 0.14      | 0.09             |
| WT           | JVM-2          | 0.17      | 1                |
| I254V        | Ramos          | 0.25      | 0.99             |
| I254N        | Ramos          | 0.25      | 0.99             |
| WT           | SUP-M2         | 0.32      | 1                |
| Deletion     | HDLM2          | 0.45      | Homozygous       |
| R273C        | Karpas-299     | 0.465     | 1                |
| Y234N        | SUDHL-8        | 0.52      | 0.47             |
| R249G        | SUDHL-8        | 0.52      | 0.52             |
| R213Q        | Raji           | 1.43      | 0.46             |
| Y234H        | Raji           | 1.43      | 0.57             |
| G266E        | Daudi          | 1.84      | 0.45             |
| WT           | TMD-8          | 2.9       | 1                |
| WT           | OCI-LY10       | 5.4       | 1                |
| R282G        | PDX 98848      | Sensitive | 1                |
| P58Qfs*65    | Jeko-1         | 7.86      | 0.97             |
| R273C        | SUDHL-4        | 9.24      | 1                |
| H193R        | BJAB           | 10.3      | 0.5              |
| WT           | OCI-LY3        | 11.2      | 1                |
| R273H        | SUDHL-1        | 11.7      | 0.66             |
| WT           | JVM-13         | 12.6      | 1                |
| V147G        | Mino           | 14.3      | 1                |
| V157A        | HBL-1          | 14.9      | 0.99             |
| G244D        | EB-1           | 16.5      | 1                |
| G245D        | Rec-1          | 17.4      | 0.51             |
| Q317*        | Rec-1          | 17.4      | 0.51             |
| R248Q        | CA-46          | 19.3      | 1                |
| R248Q        | DB             | 19.72     | 0.67             |
| R248W        | DB             | 19.72     | 0.34             |
| R248Q        | NUDHL-1        | 23.8      | 1                |
| R248W        | PDX 44685      | Resistant | 1                |

### Supplementary Table T3. EnrichR Ro-targets Oncogenic Signatures

| Term                    | Overlap | P.value    | Adjusted.P.value | Old.P.value | Old.Adjusted.P.value | Odds.Ratio | Combined.Score |
|-------------------------|---------|------------|------------------|-------------|----------------------|------------|----------------|
| TBK1.DF DN              | 68/287  | 7.42E-16   | 1.35E-13         | 0           | 0                    | 3.5782725  | 124.6554374    |
| PIGF UP.V1 UP           | 52/191  | 4.75E-15   | 4.32E-13         | 0           | 0                    | 4.28662956 | 141.3754874    |
| VEGF A UP.V1 DN         | 45/193  | 1.03E-10   | 6.25E-09         | 0           | 0                    | 3.46701586 | 79.72816825    |
| GCNP SHH UP EARLY.V1 UP | 34/174  | 1.66E-06   | 7.55E-05         | 0           | 0                    | 2.75147477 | 36.61839395    |
| CAMP UP.V1 DN           | 37/200  | 2.33E-06   | 8.47E-05         | 0           | 0                    | 2.57330428 | 33.37693622    |
| HOXA9 DN.V1 DN          | 36/195  | 3.33E-06   | 0.000101114      | 0           | 0                    | 2.56570878 | 32.35746218    |
| E2F1 UP.V1 UP           | 33/189  | 2.78E-05   | 0.000721913      | 0           | 0                    | 2.3930535  | 25.10720594    |
| GCNP SHH UP LATE.V1 UP  | 30/183  | 0.00020275 | 0.004612574      | 0           | 0                    | 2.21439693 | 18.83020057    |
| ERB2 UP.V1 DN           | 31/197  | 0.00033773 | 0.006829633      | 0           | 0                    | 2.10881515 | 16.85632146    |
| LTE2 UP.V1 DN           | 30/196  | 0.00066951 | 0.012185095      | 0           | 0                    | 2.03952286 | 14.90679784    |
| YAP1 UP                 | Nov-47  | 0.00121084 | 0.020033864      | 0           | 0                    | 3.43248859 | 23.05411275    |
| RB P130 DN.V1 DN        | 22/139  | 0.00214375 | 0.032513504      | 0           | 0                    | 2.11724174 | 13.01087352    |
| MEK UP.V1 DN            | 28/196  | 0.002825   | 0.039549941      | 0           | 0                    | 1.87835605 | 11.02453828    |
| MTOR UP.N4.V1 DN        | 26/193  | 0.00843583 | 0.10235473       | 0           | 0                    | 1.75255677 | 8.368926922    |
| EGFR UP.V1 DN           | 26/196  | 0.01023116 | 0.116379485      | 0           | 0                    | 1.72134537 | 7.8877501      |

### Supplementary Table T4. P53 knockin primers and sgRNA sequences

#### TP53 R248W mutation knock-in

#### gRNA Sequences

| gRNA label | gRNA sequence 5' - 3' |
|------------|-----------------------|
| gRNA_1     | CCGGTTCATGCCGCCCATGC  |
| gRNA_2     | GCATGGGCGGCATGAACCGG  |
| gRNA_3     | CCTGCATGGGCGGCATGAAC  |

| Repair Template Sequence                                                                |
|-----------------------------------------------------------------------------------------|
| C**GACCTGGAGTCTCCAGTGTGATGATGGTGGGATGGGCTCCAATTCATGCCCCCATGCAGGAAGTGTACACATGTAGTTGT*A*G |
| * Phosphorothioated DNA bases                                                           |

| Primer List         |             |                                    |
|---------------------|-------------|------------------------------------|
| Application         | primer name | Sequence 5'-3'                     |
| Amplicon sequencing | p53ex7F1    | ACCATCCACTACAACACTACATGTGTAACAGTTC |
| Amplicon sequencing | p53intR1    | TAGTAGTATGGAAGAAATCGGTAAGAGGTGG    |
| Sanger sequencing   | p53ex6F2    | AGCCGCCTGAGGTCTGGTTTGCAACTG        |
| Sanger sequencing   | p53intR2    | ATGTGATGAGAGGTGGATGGGTAGTAGTATGG   |
| Sanger sequencing   | M13R2       | CAGGAAACAGCTATGACC                 |
